# Supplementary material for: The prognostic impact of BMI in patients with HR+/HER2− advanced breast cancer: a study of the SONABRE registry
Source: PubMed Central journal article supplement (PMC10787675; doi:10.1007/s10549-023-07108-6), 2023-10-25
Supplement: 10549_2023_7108_MOESM1_ESM.pdf [file 10549_2023_7108_MOESM1_ESM.pdf]

## **Supplementary appendix**

Supplement to: Lammers S.W.M., Thurisch H., Vriens I.J.H., et al. The prognostic impact of BMI in patients with HR+/HER2- advanced breast cancer: a study of the SONABRE registry.

*Corresponding author:*

Vivianne C.G. Tjan-Heijnen, MD, PhD

ORCID ID: 0000-0002-3935-7440

Department of Medical Oncology, Maastricht University Medical Centre

P.O. Box 5800, 6202 AZ Maastricht, the Netherlands

Email: [vcg.tjan.heijnen@mumc.nl](mailto:vcg.tjan.heijnen@mumc.nl)

Phone: +31433877025

## Table of contents

|                                                                                                                                                                                                   |   |
|---------------------------------------------------------------------------------------------------------------------------------------------------------------------------------------------------|---|
| <b>Supplementary Table 1.</b> Baseline characteristics of patients with metachronous metastases according to BMI class at diagnosis of HR+/HER2- ABC (N (%)).....                                 | 3 |
| <b>Supplementary Fig. 1</b> Type of first-given systemic therapy in patients diagnosed with HR+/HER2- ABC between 2017 and 2020, according to BMI class at diagnosis.....                         | 5 |
| <b>Supplementary Fig. 2</b> Overall survival (a) and first-line progression-free survival (b) according to BMI class at diagnosis of HR+/HER2- ABC in patients with metachronous metastases ..... | 6 |
| <b>Supplementary Table 2.</b> Multivariable analyses of overall survival.....                                                                                                                     | 7 |
| <b>Supplementary Table 3.</b> Multivariable analyses of first-line progression-free survival .....                                                                                                | 9 |

**Supplementary Table 1.** Baseline characteristics of patients with metachronous metastases according to BMI class at diagnosis of HR+/HER2- ABC (N (%))

|                                                     | Total<br>n = 1,084 (100%) | Underweight<br>n = 20 (2%) | Normal weight<br>n = 460 (42%) | Overweight<br>n = 359 (33%) | Obese<br>n = 245 (23%) | p-value |
|-----------------------------------------------------|---------------------------|----------------------------|--------------------------------|-----------------------------|------------------------|---------|
| Sex                                                 |                           |                            |                                |                             |                        | 0.84    |
| Female                                              | 1,070 (99)                | 20 (100)                   | 455 (99)                       | 353 (98)                    | 242 (99)               |         |
| Median age – years (range)                          | 68 (29-94)                | 63 (47-88)                 | 68 (29-94)                     | 68 (36-93)                  | 68 (38-89)             | 0.67    |
| Age                                                 |                           |                            |                                |                             |                        | 0.51    |
| <60 years                                           | 279 (26)                  | 7 (35)                     | 126 (27)                       | 87 (24)                     | 59 (24)                |         |
| ≥60 years                                           | 805 (74)                  | 13 (65)                    | 334 (73)                       | 272 (76)                    | 186 (76)               |         |
| WHO performance status                              |                           |                            |                                |                             |                        | 0.002   |
| 0-1                                                 | 831 (84)                  | 10 (59)                    | 351 (85)                       | 293 (87)                    | 177 (79)               |         |
| 2-4                                                 | 160 (16)                  | 7 (41)                     | 63 (15)                        | 43 (13)                     | 47 (21)                |         |
| Unknown                                             | 93                        | 3                          | 46                             | 23                          | 21                     |         |
| Comorbidities <sup>a</sup>                          |                           |                            |                                |                             |                        | <0.001  |
| No                                                  | 382 (35)                  | 6 (30)                     | 191 (42)                       | 121 (34)                    | 64 (26)                |         |
| Yes                                                 | 702 (65)                  | 14 (70)                    | 269 (59)                       | 238 (66)                    | 181 (74)               |         |
| MFI                                                 |                           |                            |                                |                             |                        | 0.16    |
| 3-60 months                                         | 354 (33)                  | 5 (25)                     | 138 (30)                       | 118 (33)                    | 93 (38)                |         |
| >60 months                                          | 730 (67)                  | 15 (75)                    | 322 (70)                       | 241 (67)                    | 152 (62)               |         |
| Number of metastatic sites                          |                           |                            |                                |                             |                        | 0.22    |
| Single                                              | 497 (46)                  | 10 (50)                    | 195 (42)                       | 169 (47)                    | 123 (50)               |         |
| Multiple                                            | 587 (54)                  | 10 (50)                    | 265 (58)                       | 190 (53)                    | 122 (50)               |         |
| Site of metastases                                  |                           |                            |                                |                             |                        | 0.02    |
| Bone only                                           | 355 (33)                  | 4 (20)                     | 120 (28)                       | 128 (36)                    | 93 (38)                |         |
| Soft tissue, without visceral or CNS manifestations | 129 (12)                  | 2 (10)                     | 51 (11)                        | 38 (11)                     | 38 (16)                |         |
| Visceral or other, without CNS manifestations       | 565 (52)                  | 14 (70)                    | 262 (57)                       | 179 (50)                    | 110 (45)               |         |
| CNS                                                 | 35 (3)                    | 0 (0)                      | 17 (4)                         | 14 (4)                      | 4 (2)                  |         |
| (Neo)adjuvant treatment                             |                           |                            |                                |                             |                        | 0.85    |
| No (incl. MFI < 3 months)                           | 293 (27)                  | 5 (25)                     | 127 (28)                       | 100 (28)                    | 61 (25)                |         |
| Yes                                                 | 791 (73)                  | 15 (75)                    | 333 (72)                       | 259 (72)                    | 184 (75)               |         |
| (Neo)adjuvant endocrine treatment                   |                           |                            |                                |                             |                        | 0.52    |
| No (incl. MFI < 3 months)                           | 338 (31)                  | 5 (25)                     | 150 (33)                       | 115 (32)                    | 68 (28)                |         |
| Yes                                                 | 746 (69)                  | 15 (75)                    | 310 (67)                       | 244 (68)                    | 177 (72)               |         |
| Endocrine sensitivity                               |                           |                            |                                |                             |                        | 0.04    |
| Resistant                                           | 354 (33)                  | 7 (35)                     | 129 (28)                       | 126 (35)                    | 92 (38)                |         |
| Sensitive                                           | 730 (67)                  | 13 (65)                    | 331 (72)                       | 233 (65)                    | 153 (62)               |         |
| Type of first-line endocrine therapy for ABC        |                           |                            |                                |                             |                        | 0.33    |
| Aromatase inhibitor                                 | 842 (78)                  | 17 (85)                    | 353 (77)                       | 287 (80)                    | 185 (76)               |         |
| Tamoxifen                                           | 124 (11)                  | 3 (15)                     | 59 (13)                        | 37 (10)                     | 25 (10)                |         |
| Fulvestrant                                         | 115 (11)                  | 0 (0)                      | 47 (10)                        | 35 (10)                     | 33 (14)                |         |
| Other                                               | 3 (<1)                    | 0 (0)                      | 1 (<1)                         | 0 (0)                       | 2 (1)                  |         |

Abbreviations: ABC = advanced breast cancer; CNS = central nervous system; HR+/HER2- = hormone receptor-positive/ human epidermal growth factor receptor-2-negative; MFI = metastatic-free interval; WHO = World Health Organization.

Data in each cell represent numbers with associated percentages, unless otherwise specified. Percentages may exceed 100% due to rounding.

<sup>a</sup>The definition of comorbidities includes the following conditions: diabetes mellitus, cerebrovascular disease, connective tissue disease, dementia, hypertension, chronic pulmonary disease, liver disease, renal disease, AIDS, peptic ulcer, leukaemia, malignant lymphoma, myocardial infarction, malignant solid tumour (excluding breast cancer and basal cell carcinoma of the skin), osteoporosis, chronic bowel disease, chronic infectious disease, atherosclerosis, heart failure, mental health conditions, thromboembolism, and heart rhythm disorders.

**Supplementary Fig. 1** Type of first-given systemic therapy in patients diagnosed with HR+/HER2- ABC between 2017 and 2020, according to BMI class at diagnosis

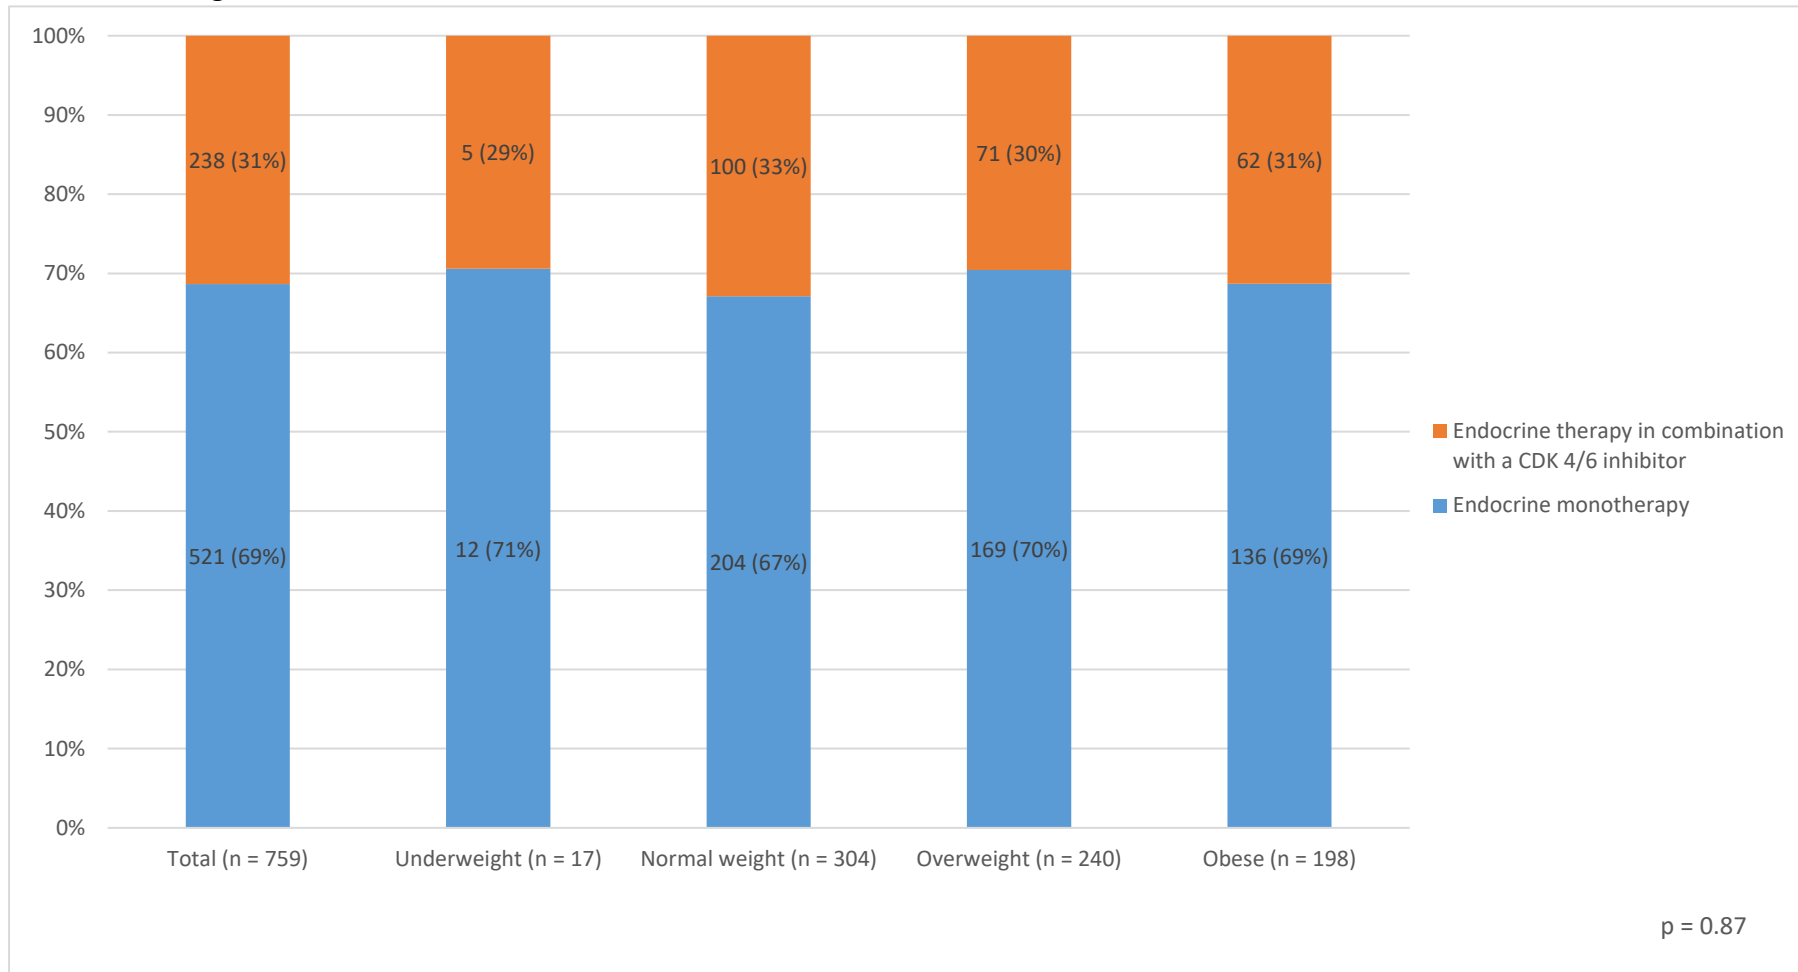

**Supplementary Fig. 2** Overall survival (a) and first-line progression-free survival (b) according to BMI class at diagnosis of HR+/HER2- ABC in patients with metachronous metastases

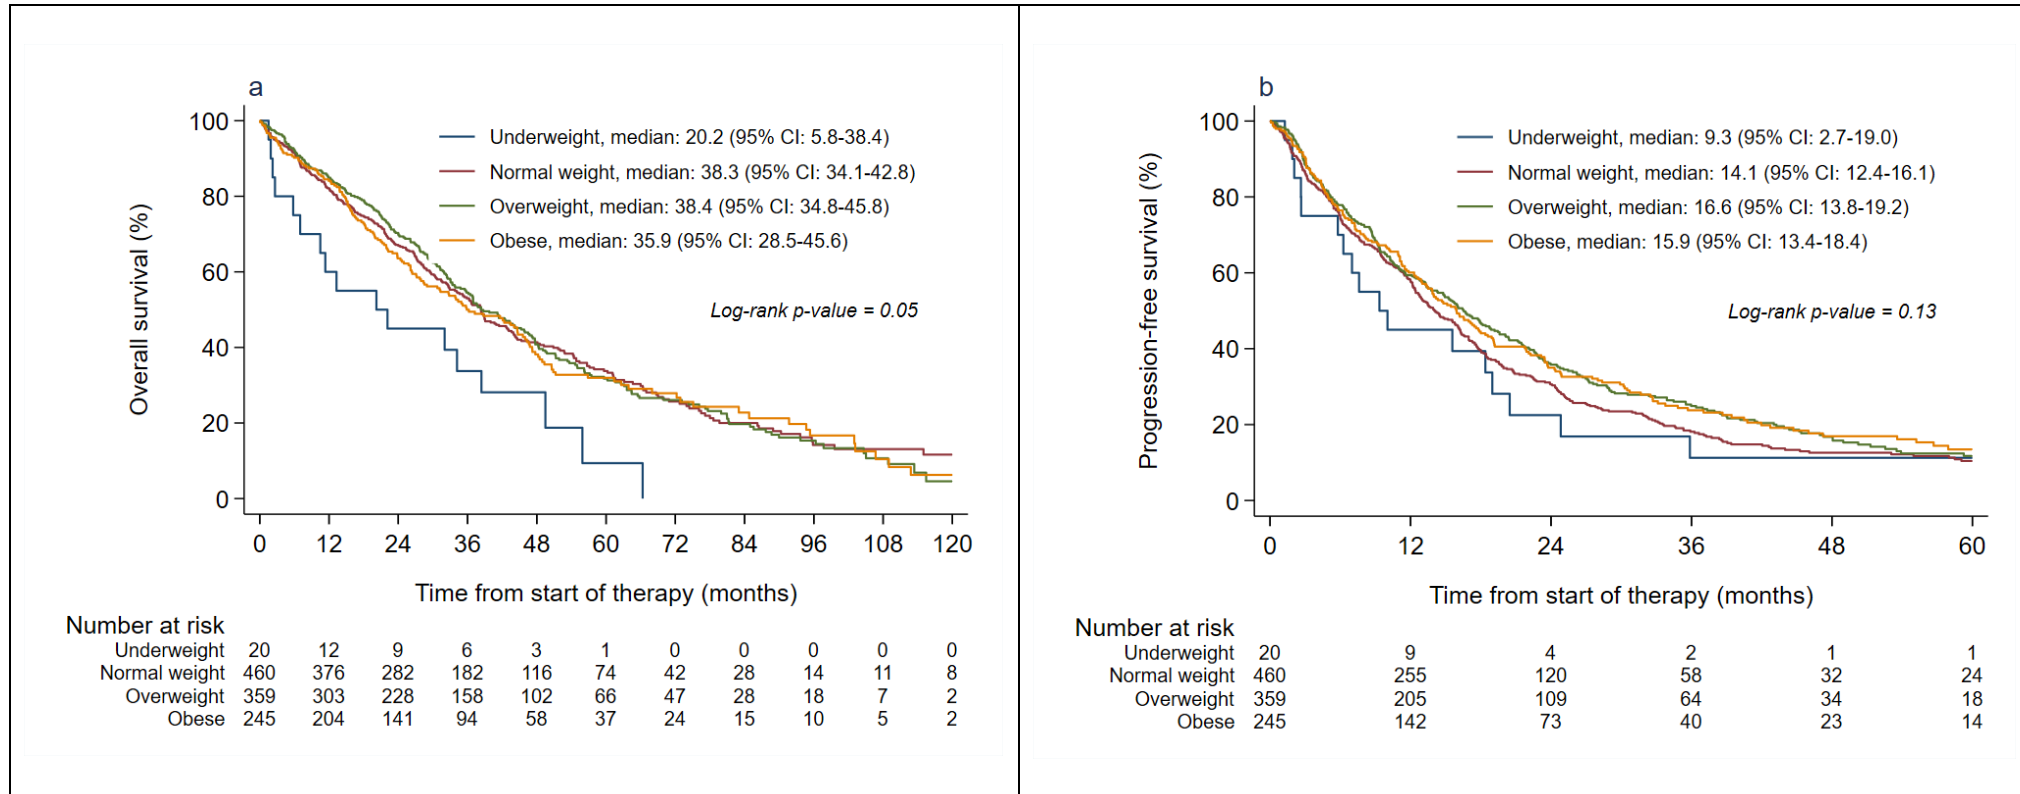

**Supplementary Table 2.** Multivariable analyses of overall survival

|                                   |                                                    | n (%)      | All patients<br>(n = 1,456 patients, 943 events) |         | n (%)    | Patients with metachronous metastases<br>(n = 1,084 patients, 715 events) |         |                       |         |
|-----------------------------------|----------------------------------------------------|------------|--------------------------------------------------|---------|----------|---------------------------------------------------------------------------|---------|-----------------------|---------|
|                                   |                                                    |            | Model 1                                          |         |          | Model 2                                                                   |         | Model 3               |         |
|                                   |                                                    |            | Hazard ratio (95% CI)                            | p-value |          | Hazard ratio (95% CI)                                                     | p-value | Hazard ratio (95% CI) | p-value |
| <b>BMI</b>                        |                                                    |            |                                                  |         |          |                                                                           |         |                       |         |
|                                   | Underweight                                        | 35 (2)     | 1.45 (0.97-2.15)                                 | 0.07    | 20 (2)   | 1.84 (1.12-3.03)                                                          | 0.02    | 1.85 (1.13-3.05)      | 0.02    |
|                                   | Normal weight                                      | 580 (40)   | Ref                                              |         | 460 (42) | Ref                                                                       |         | Ref                   |         |
|                                   | Overweight                                         | 479 (33)   | 0.99 (0.85-1.16)                                 | 0.93    | 359 (33) | 0.99 (0.83-1.17)                                                          | 0.90    | 0.95 (0.80-1.13)      | 0.57    |
|                                   | Obese                                              | 362 (25)   | 1.04 (0.88-1.24)                                 | 0.62    | 245 (23) | 1.01 (0.83-1.23)                                                          | 0.90    | 0.99 (0.81-1.20)      | 0.89    |
| <b>Age</b>                        |                                                    |            |                                                  |         |          |                                                                           |         |                       |         |
|                                   | 18-55 years                                        | 267 (18)   | Ref                                              |         | 181 (17) | Ref                                                                       |         | Ref                   |         |
|                                   | 56-75 years                                        | 793 (54)   | 1.10 (0.91-1.32)                                 | 0.32    | 624 (58) | 0.99 (0.80-1.22)                                                          | 0.90    | 1.08 (0.87-1.33)      | 0.50    |
|                                   | >75 years                                          | 396 (27)   | 1.39 (1.12-1.73)                                 | 0.002   | 279 (26) | 1.14 (0.88-1.47)                                                          | 0.31    | 1.29 (1.00-1.66)      | 0.05    |
| <b>WHO performance status</b>     |                                                    |            |                                                  |         |          |                                                                           |         |                       |         |
|                                   | 0-1                                                | 1,103 (76) | Ref                                              |         | 831 (77) | Ref                                                                       |         | Ref                   |         |
|                                   | 2-4                                                | 227 (16)   | 1.81 (1.51-2.17)                                 | <0.001  | 160 (15) | 1.90 (1.53-2.34)                                                          | <0.001  | 1.88 (1.52-2.32)      | <0.001  |
|                                   | Unknown                                            | 126 (9)    | 1.29 (1.05-1.58)                                 | 0.02    | 93 (9)   | 1.28 (1.01-1.62)                                                          | 0.04    | 1.36 (1.07-1.72)      | 0.01    |
| <b>Comorbidities</b>              |                                                    |            |                                                  |         |          |                                                                           |         |                       |         |
|                                   | No                                                 | 521 (36)   | Ref                                              |         | 382 (35) | Ref                                                                       |         | Ref                   |         |
|                                   | Yes                                                | 935 (64)   | 1.26 (1.08-1.46)                                 | 0.003   | 702 (65) | 1.28 (1.08-1.52)                                                          | 0.005   | 1.30 (1.10-1.54)      | 0.002   |
| <b>Metastatic-free interval</b>   |                                                    |            |                                                  |         |          |                                                                           |         |                       |         |
|                                   | <3 months                                          | 372 (26)   | Ref                                              |         |          |                                                                           |         |                       |         |
|                                   | 3-60 months                                        | 354 (24)   | 1.64 (1.37-1.97)                                 | <0.001  | 354 (33) | Ref                                                                       |         | Ref                   |         |
|                                   | >60 months                                         | 730 (50)   | 0.92 (0.78-1.09)                                 | 0.34    | 730 (67) | 0.57 (0.49-0.67)                                                          | <0.001  | 0.76 (0.64-0.91)      | 0.003   |
| <b>Number of metastatic sites</b> |                                                    |            |                                                  |         |          |                                                                           |         |                       |         |
|                                   | Single                                             | 691 (47)   | Ref                                              |         | 497 (46) | Ref                                                                       |         | Ref                   |         |
|                                   | Multiple                                           | 765 (53)   | 1.58 (1.28-1.96)                                 | <0.001  | 587 (54) | 1.47 (1.16-1.87)                                                          | 0.002   | 1.50 (1.18-1.91)      | 0.001   |
| <b>Site of metastases</b>         |                                                    |            |                                                  |         |          |                                                                           |         |                       |         |
|                                   | Bone only                                          | 507 (35)   | Ref                                              |         | 355 (33) | Ref                                                                       |         | Ref                   |         |
|                                   | Soft tissue without visceral or CNS manifestations | 184 (13)   | 0.64 (0.48-0.86)                                 | 0.003   | 129 (12) | 0.64 (0.45-0.90)                                                          | 0.01    | 0.65 (0.46-0.92)      | 0.01    |
|                                   | Visceral or other, without CNS manifestations      | 725 (50)   | 0.97 (0.77-1.23)                                 | 0.83    | 565 (52) | 1.05 (0.81-1.37)                                                          | 0.70    | 1.05 (0.81-1.37)      | 0.69    |
|                                   | CNS                                                | 40 (3)     | 1.59 (1.07-2.36)                                 | 0.02    | 35 (3)   | 1.45 (0.94-2.23)                                                          | 0.10    | 1.35 (0.88-2.07)      | 0.17    |
| <b>Endocrine sensitivity</b>      |                                                    |            |                                                  |         |          |                                                                           |         |                       |         |

|  |           |  |   |  |          |   |  |                  |        |
|--|-----------|--|---|--|----------|---|--|------------------|--------|
|  | Sensitive |  | - |  | 730 (67) | - |  | Ref              |        |
|  | Resistant |  | - |  | 354 (33) | - |  | 1.95 (1.63-2.34) | <0.001 |



**Supplementary Table 3. Multivariable analyses of first-line progression-free survival**

|                                                    | n (%)      | All patients<br>(n = 1,456 patients, 1184 events) |         | n (%)    | Patients with metachronous metastases<br>(n = 1,084 patients, 880 events) |         |                       |         |
|----------------------------------------------------|------------|---------------------------------------------------|---------|----------|---------------------------------------------------------------------------|---------|-----------------------|---------|
|                                                    |            | Model 1                                           |         |          | Model 2                                                                   |         | Model 3               |         |
|                                                    |            | Hazard ratio (95% CI)                             | p-value |          | Hazard ratio (95% CI)                                                     | p-value | Hazard ratio (95% CI) | p-value |
| <b>BMI</b>                                         |            |                                                   |         |          |                                                                           |         |                       |         |
| Underweight                                        | 35 (2)     | 1.05 (0.73-1.51)                                  | 0.81    | 20 (2)   | 1.13 (0.70-1.82)                                                          | 0.61    | 1.18 (0.73-1.91)      | 0.49    |
| Normal weight                                      | 580 (40)   | Ref                                               |         | 460 (42) | Ref                                                                       |         | Ref                   |         |
| Overweight                                         | 479 (33)   | 0.90 (0.79-1.03)                                  | 0.14    | 359 (33) | 0.87 (0.75-1.02)                                                          | 0.09    | 0.86 (0.74-1.01)      | 0.06    |
| Obese                                              | 362 (25)   | 0.88 (0.76-1.02)                                  | 0.10    | 245 (23) | 0.85 (0.71-1.02)                                                          | 0.07    | 0.86 (0.72-1.02)      | 0.09    |
| <b>WHO performance status</b>                      |            |                                                   |         |          |                                                                           |         |                       |         |
| 0-1                                                | 1,103 (76) | Ref                                               |         | 831 (77) | Ref                                                                       |         | Ref                   |         |
| 2-4                                                | 227 (16)   | 1.38 (1.17-1.63)                                  | <0.001  | 160 (15) | 1.39 (1.14-1.70)                                                          | 0.001   | 1.36 (1.11-1.65)      | 0.002   |
| Unknown                                            | 126 (9)    | 1.23 (1.01-1.50)                                  | 0.04    | 93 (9)   | 1.25 (1.00-1.56)                                                          | 0.05    | 1.24 (0.99-1.55)      | 0.06    |
| <b>Comorbidities</b>                               |            |                                                   |         |          |                                                                           |         |                       |         |
| No                                                 | 521 (36)   | Ref                                               |         | 382 (35) | Ref                                                                       |         | Ref                   |         |
| Yes                                                | 935 (64)   | 1.10 (0.97-1.24)                                  | 0.13    | 702 (65) | 1.09 (0.95-1.26)                                                          | 0.22    | 1.12 (0.97-1.30)      | 0.11    |
| <b>Metastatic-free interval</b>                    |            |                                                   |         |          |                                                                           |         |                       |         |
| <3 months                                          | 372 (26)   | Ref                                               |         |          | -                                                                         |         | -                     |         |
| 3-60 months                                        | 354 (24)   | 1.39 (1.19-1.64)                                  | <0.001  | 354 (33) | Ref                                                                       |         | Ref                   |         |
| >60 months                                         | 730 (50)   | 0.90 (0.78-1.04)                                  | 0.14    | 730 (67) | 0.65 (0.57-0.75)                                                          | <0.001  | 0.86 (0.73-1.01)      | 0.07    |
| <b>Number of metastatic sites</b>                  |            |                                                   |         |          |                                                                           |         |                       |         |
| Single                                             | 691 (47)   | Ref                                               |         | 497 (46) | Ref                                                                       |         | Ref                   |         |
| Multiple                                           | 765 (53)   | 1.41 (1.17-1.70)                                  | <0.001  | 587 (54) | 1.30 (1.05-1.60)                                                          | 0.02    | 1.33 (1.08-1.64)      | 0.008   |
| <b>Site of metastases</b>                          |            |                                                   |         |          |                                                                           |         |                       |         |
| Bone only                                          | 507 (35)   | Ref                                               |         | 355 (33) | Ref                                                                       |         | Ref                   |         |
| Soft tissue without visceral or CNS manifestations | 184 (13)   | 0.82 (0.64-1.05)                                  | 0.12    | 129 (12) | 0.84 (0.63-1.11)                                                          | 0.22    | 0.86 (0.65-1.15)      | 0.32    |
| Visceral or other, without CNS manifestations      | 725 (50)   | 1.06 (0.86-1.29)                                  | 0.59    | 565 (52) | 1.12 (0.89-1.41)                                                          | 0.34    | 1.14 (0.91-1.44)      | 0.26    |
| CNS                                                | 40 (3)     | 1.36 (0.93-2.01)                                  | 0.12    | 35 (3)   | 1.33 (0.87-2.03)                                                          | 0.20    | 1.24 (0.81-1.90)      | 0.32    |
| <b>Endocrine sensitivity</b>                       |            |                                                   |         |          |                                                                           |         |                       |         |
| Sensitive                                          |            | -                                                 |         | 730 (67) | -                                                                         |         | Ref                   |         |
| Resistant                                          |            | -                                                 |         | 354 (33) | -                                                                         |         | 1.90 (1.62-2.24)      | <0.001  |
